1 **An integrated active case search for skin-NTDs in yaws endemic health districts in**  
2 **Cameroon, Côte d’Ivoire and Ghana**

3

4 Serges Tchatchouang<sup>1\*</sup>, Laud A. Basing<sup>2</sup>, Kouadio-Aboh Hugues<sup>3,4</sup>, Becca L. Handley<sup>5</sup>,  
5 Camila G-Beiras<sup>6,7</sup>, Ivy Amanor<sup>2</sup>, Philippe Ndzomo<sup>1</sup>, Mohammed Bakheit<sup>8</sup>, Lisa Becherer<sup>9</sup>,  
6 Sascha Knaufl<sup>10,11</sup>, Claudia Müller<sup>10</sup>, Earnest Njih-Tabah<sup>12,13</sup>, Theophilus Njmanishi<sup>12</sup>, Tania  
7 Crucitti<sup>14</sup>, Nadine Borst<sup>9,15</sup>, Simone Lüert<sup>10</sup>, Sieghard Frischmann<sup>8</sup>, Helena Gmoser<sup>9</sup>, Emelie  
8 Landmann<sup>8</sup>, Aboubacar Sylla<sup>3</sup>, Mireille S. Kouamé-Sina<sup>3</sup>, Daniel Arhinful<sup>2</sup>, Patrick Awondo<sup>1</sup>,  
9 Gely Menguenta<sup>1</sup>, Emma-Michèle Harding-Esch<sup>16</sup>, Adingra Tano<sup>3</sup>, Mamadou Kaloga<sup>17</sup>, Paul  
10 Koffi-Aboa<sup>17</sup>, Nana Konama-Kotey<sup>18</sup>, Oriol Mitjà<sup>6,7</sup>, Sara Eyangoh<sup>1</sup>, Kennedy Kwasi-Addo<sup>2</sup>,  
11 Solange Ngazoa-Kakou<sup>3</sup>, Michael Marks<sup>5, 16, 19</sup>

12 **Affiliation:**

13 <sup>1</sup> Centre Pasteur du Cameroun, P.O. Box 1274; 451, Street 2005, Yaoundé 2; Yaoundé,  
14 Cameroon

15 <sup>2</sup> Noguchi Memorial Institute for Medical Research, University of Ghana, Ghana.

16 <sup>3</sup> Institut Pasteur de Cote d'Ivoire, Abidjan, Lagunes, Côte d'Ivoire.

17 <sup>4</sup> National Program of African Trypanosomiasis Elimination, Abidjan, Côte d'Ivoire.

18 <sup>5</sup> Clinical Research Department, London School of Hygiene & Tropical Medicine, Keppel  
19 Street, London, UK

20 <sup>6</sup> Skin Neglected Tropical Diseases and Sexually Transmitted Infections section, Hospital  
21 Universitari Germans Trías i Pujol; Fight Infectious Diseases Foundation, Badalona, Spain;

22 <sup>7</sup> Universitat Autònoma de Barcelona, 08193 Bellaterra (Cerdanyola del Vallès), Spain

23 <sup>8</sup> Mast Diagnostica GmbH, Reinfeld, Germany.

24 <sup>9</sup> Laboratory for MEMS Applications, IMTEK - Department of Microsystems Engineering,  
25 University of Freiburg, Freiburg, Germany.

26 <sup>10</sup> Institute of International Animal Health/One Health, Friedrich-Loeffler-Institut, Federal

27 <sup>11</sup> Professorship for One Health/International Animal Health, Faculty of Veterinary Medicine,  
28 Justus Liebig University, Giessen, Germany.

29 <sup>12</sup> National Buruli Ulcer, Leprosy, Yaws and Leishmaniasis Control Program, Ministry of  
30 Public Health, Yaounde, Centre Region, Cameroon.

31 <sup>13</sup> Public Health & Epidemiology, University of Dschang, Dschang, West Region, Cameroon.

32 <sup>14</sup> Experimental Bacteriology Unit, Institut Pasteur de Madagascar, Antananarivo, Madagascar

33 <sup>15</sup> Hahn-Schickard, Freiburg, Germany.

34 <sup>16</sup> Clinical Research Department, London School of Hygiene & Tropical Medicine, Faculty of  
35 Infectious and Tropical Diseases, London, UK.

36 <sup>17</sup> Programme National de Lutte contre l'Ulcère de Buruli, Abidjan, Côte d'Ivoire.

37 <sup>18</sup> National Yaws Eradication Program, Ghana Health Service, Accra, Ghana.

38 <sup>19</sup> Hospital for Tropical Diseases, London, UK.

39

40 \* **Correspondence:** [tchatchouang@pasteur-yaounde.org](mailto:tchatchouang@pasteur-yaounde.org)

41

42 **Short title: Overview of skin-NTDs in West Africa**

43

44 **Abstract**

45 Background: Integrated approaches to mapping skin Neglected Tropical Diseases (NTDs)  
46 may be cost-effective way to guide decisions on resource mobilization. Pilot studies have  
47 been carried out, but large-scale data covering multiple countries endemic for skin-NTDs are  
48 lacking. Within the LAMP4YAWS project, we collected integrated data on the burden of  
49 multiple skin-NTDs.

50 Methods: From March 2021 to March 2023, integrated case searches for yaws alongside other  
51 skin conditions were performed in endemic health districts of yaws in Cameroon, Côte  
52 d'Ivoire, and Ghana. Initial screening involved a brief clinical examination of participants to  
53 determine if any skin conditions were suspected. Cases of skin-NTDs were then referred to a  
54 health facility for appropriate management.

55 Results: Overall 61,080 individuals screened, 11,387 (18.6%) had skin lesions. The majority  
56 of individuals (>90%) examined were children aged 15 years old and under. The proportion  
57 of serologically confirmed yaws cases was 8.6% (18/210) in Cameroon, 6.8% (84/1232) in  
58 Côte d'Ivoire, and 26.8% (440/1643) in Ghana. Other skin conditions based on clinical  
59 examination included: scabies, Buruli ulcer, leprosy, lymphatic filariasis (lymphoedema and  
60 hydrocele), tungiasis, and fungal infections. The most common conditions were scabies and  
61 superficial fungal infections (scabies versus fungal infections) in Cameroon with 5.1%  
62 (214/4204) versus 88.7% (3730/4204), Côte d'Ivoire with 25.2% (1285/5095) versus 50.4%  
63 (2567/5095) and Ghana 20% (419/2090) versus 1.3% (28/2090). Other skin-NTDs were less  
64 common across all three countries.

65 Conclusion: This study confirms that integrated screening allows simultaneous detection of  
66 multiple skin-NTDs, maximising use of scarce resources.

67

68 **Keywords:** Yaws, integrated surveillance, skin-NTDs, Cameroon, Côte d'Ivoire, Ghana.

69

70 **Plain English Summary**

71 Many Neglected Tropical Diseases (NTDs) predominantly affect the skin and are referred to  
72 as skin-NTDs. The World Health Organization (WHO) has developed a number of strategies  
73 for the control, eradication and elimination of skin-NTDs and recognizes the importance of  
74 integrated approaches to mapping skin-NTDs. We conducted a study adopting integrated  
75 screening for multiple skin-NTDs and other skin conditions in Cameroon, Côte d'Ivoire, and  
76 Ghana. This ran alongside a study focused on diagnostic tests for one specific skin-NTD –  
77 yaws.

78 The results showed that integrated screening is a feasible and cost-effective way to detect  
79 multiple skin-NTDs in a single intervention. Of more than 60,000 individuals screened almost  
80 one in five had a skin lesion. Cases of yaws confirmed by blood tests were detected more  
81 frequently in Ghana compared to Côte d'Ivoire and Cameroon. The most common skin  
82 conditions were scabies and superficial fungal infections. Other skin-NTDs such as Buruli  
83 ulcer, leprosy, lymphatic filariasis and tungiasis were less common. Integrated screening  
84 allowed detection of skin conditions and co-endemicity of skin-NTDs and the data can guide  
85 decisions on resource mobilization to manage skin-NTDs.

86

87

## 88 INTRODUCTION

89 Skin diseases affect over 900 million people worldwide annually and are the third most  
90 frequent reason for seeking care (1-3). A subset of these conditions are also classified by the  
91 World Health Organization (WHO) as Neglected Tropical Diseases (NTDs) (4). Of the twenty  
92 NTDs recognised by WHO, more than half can present as skin diseases and are referred to as  
93 skin-NTDs. If not diagnosed and treated promptly, these conditions can result in  
94 disfigurement, disability, stigmatisation, impacts on mental health, and socioeconomic  
95 difficulties (4-6).

96 In Cameroon, Côte d'Ivoire, and Ghana, several skin-NTDs are known to be endemic  
97 including yaws (7-10), Buruli ulcer (11-13), leishmaniasis (14-16), leprosy (10, 17, 18),  
98 lymphatic filariasis (19-21), mycetoma (22-24), onchocerciasis (25-27), and scabies (10, 28-  
99 30). Alongside these conditions, a number of more common skin conditions including  
100 superficial fungal and bacterial infections cause a considerable burden of disease (28, 31-33).

101 Most data on skin-NTDs rely on passive surveillance activities, which are likely to  
102 underestimate the true burden of disease as they are dependent on patients who present to a  
103 health centre, receive a diagnosis and are reported to the respective disease control  
104 programme. The highest burden of skin-NTDs is believed to be in communities living in  
105 difficult to reach areas with limited access to healthcare (34, 35). Consequently, routine data  
106 are likely to underreport the true burden and epidemiology of these conditions.

107 To achieve the WHO goals for skin-NTDs, active case detection will be required. Therefore,  
108 WHO has recently promoted integrated activities of skin-NTDs in order to accelerate progress  
109 in their control, elimination and eradication (4, 36). Because NTDs often overlap in  
110 geographic areas, integrated active case searching may offer a way to overcome some of the  
111 challenges associated with stand-alone programmes and reduce the risk of late detection of  
112 skin-NTDs. Integration can also result in a reduction of resources, thereby increasing cost-  
113 effectiveness and allow for an expanded coverage of interventions (2, 36-38).

114 The LAMP4YAWS project in Cameroon, Côte d'Ivoire, and Ghana aimed to implement and  
115 evaluate a loop-mediated isothermal amplification test for yaws. As part of the project, field  
116 activities included active case searching of yaws using an integrated approach (39). Here we  
117 report data on skin conditions from active case searches in yaws-endemic health districts from  
118 all three countries.

119

## 120 **METHODS**

### 121 **Study design**

122 From March 2021 to March 2023, we undertook integrated case searches in rural  
123 communities within suspected yaws-endemic health districts in Cameroon, Côte d'Ivoire, and  
124 Ghana. Integrated approach for skin-NTDs offers possibility to address several diseases  
125 simultaneously in the same communities in order to maximize the utilization of limited  
126 resources (40). This approach was implemented by assessing burden of yaws in health  
127 districts from notifications of NTD national programs, training of health workers and village  
128 volunteers, conducting active case detection of skin conditions, clinical diagnosis and rapid  
129 tests for yaws, treating yaws cases and referring other skin conditions to healthcare centres  
130 (2). In each community visited, initial screening involved an examination to determine if  
131 participants had skin lesions as described in the study protocol (39).

### 132 **Study sites**

133 The study was conducted in rural areas in 12 health districts in Cameroon, six in Côte  
134 d'Ivoire, and seven in Ghana (39). The characteristics of the study sites are summarised in  
135 Table 1. Study sites were selected based on clinical notifications of yaws by the national  
136 programmes on NTDs.

### 137 **Recruitment of participants**

138 Case searches were conducted in collaboration with national NTD programmes. District  
139 health staff were first trained to recognise skin-NTDs as well as other skin conditions.  
140 Training materials included the WHO manual on recognition of skin-NTDs (41), as well as  
141 other national NTD training materials.

142 Individuals presenting with yaws-like lesions underwent SD Bioline (Abbott, USA) test to  
143 detect anti-treponemal antibodies. Those reactive underwent a Chembio Dual Path Platform  
144 (DPP) test (Chembio Diagnostics, New York, USA) for simultaneous detection of both  
145 treponemal and non-treponemal antibodies, interpreted as serologically confirmed yaws case.  
146 Samples were then taken as part of the main study from participants as described elsewhere  
147 (39). Other skin diseases were recorded and referred to the health district for management  
148 following the national guidelines.

149 Several approaches were used for case finding, including community-based case detection,  
 150 detection in healthcare centres, primary school-based screening programs, screening alongside  
 151 mass drug administration (MDA) campaigns, church and house-to-house case searches (Table  
 152 1). The strategy was chosen based on other activities taking place in the selected district. The  
 153 research team visited different study sites according to a pre-established schedule that was  
 154 communicated to health workers, village chiefs, and school directors before the appointed  
 155 day.

156 **Table 1: Characteristic of study sites in Cameroon, Côte d’Ivoire and Ghana.**

| Country  | Region            | Health district | Sub-divisions                                | Population                | Active case searching strategy |
|----------|-------------------|-----------------|----------------------------------------------|---------------------------|--------------------------------|
| Cameroon | East              | Doumé           | Doumé, Doumaitang, Dimako                    | 53,286                    | Community, House-to-house      |
|          |                   | Bétaré-Oya      | Betaré-Oya, Ngoura                           | 141,405                   | Community, health centres      |
|          |                   | Batouri         | Batouri, Ndemnam                             | 121,199                   | Community, health centres      |
|          |                   | Messamena       | Messamena, Somalomo                          | 48,000                    | Community, health centres      |
|          |                   | Abong-Mbang     | Abong-Mbang, Atok, Angossas, Dja (Mindourou) | 85,741                    | Community, health centres      |
|          |                   | Lomié           | Lomié, Messok, Ngoyla                        | 47,695                    | Community, health centres      |
|          |                   | Yokadouma       | Gari-Gombo, Yokadouma                        | 126,353                   | Community, health centres      |
|          | Mbang             | Mbang           | 34,148                                       | Community, House-to-house |                                |
|          | South             | Djourn          | Djourn, Oveng, Mintom                        | 43,142                    | MDA                            |
| Lolodorf | Bipindi, Lolodorf | 43,446          | Community                                    |                           |                                |

|                  |                   |                                                |                           |         |                              |
|------------------|-------------------|------------------------------------------------|---------------------------|---------|------------------------------|
|                  |                   |                                                | Mvengue,<br>Akom 2        |         |                              |
|                  |                   | Sangmélima                                     | Sangmelima<br>, Meyomessi | 110,385 | School, community            |
|                  | Adamawa           | Bankim                                         | Bankim                    | 121,756 | School, community,<br>church |
| Côte<br>d'Ivoire | Loh<br>Djiboua    | Divo                                           | Goh-<br>Djiboua           | 458,318 | School, Community            |
|                  | Agneby<br>Tiassa  | Tiassalé                                       | Lagunes                   | 270,412 |                              |
|                  | Bélier            | Toumodi                                        | Lacs                      | 189,794 |                              |
|                  |                   | Autonomou<br>s district of<br>Yamoussou<br>kro | N/A                       | 446,158 |                              |
|                  | Haut<br>sassandra | Daloa                                          | Sassandra-<br>Marahou     | 745,628 |                              |
|                  |                   | Vavoua                                         | Sassandra-<br>Marahou     | 451,492 |                              |
| Ghana            | Central           | Asikuma<br>Odoben<br>Brakwa                    | N/A                       | 129,580 | School, Community            |
|                  |                   | Ajumako<br>Enyan<br>Essiam                     | N/A                       | 138,046 |                              |
|                  | Eastern           | Upper West<br>Akim                             | N/A                       | 93,391  |                              |
|                  |                   | Ayensuanor                                     | N/A                       | 94,594  |                              |
|                  |                   | Akuapim<br>North                               | N/A                       | 105,315 |                              |
|                  |                   | Asene<br>Manso<br>Akroso                       | N/A                       | 77,498  |                              |
|                  | Western           | Mpohor                                         | N/A                       | 52,473  |                              |

157 MDA: Mass drug administration; N/A: not applicable

158 **Case definition of other skin conditions**

159 In order to be considered a case of leprosy (Hansen's Disease), an individual must have one or  
160 more of skin lesions that were hypopigmented or red and had definite loss of sensation.

161 Buruli ulcer case was based on clinical presentation consistent with a painless, non-healing  
162 ulcer with undermined edges and a necrotic base, typically located on the limbs; a painless  
163 nodule or plaque, typically located on the limbs; and oedema of a limb or other body part,  
164 with or without overlying ulceration.

165 Scabies were defined as people with rash consisting of papules, vesicles, and burrows,  
166 typically located on the hands, feet, and folds of the skin.

167 An individual suffering from lymphatic filariasis presented lymphedema characterised by the  
168 enlargement of body parts in the limbs and breasts; or hydrocele marked by swelling in the  
169 scrotal sack.

170 Case of tungiasis was defined as participant with a painful, pruritic nodule with a central  
171 black dot, mainly located on the feet, toes, or fingers.

172 Superficial fungal infections were defined as affection on the body commonly with a red,  
173 ring-shaped rash with a raised border for *Tinea corporis* (ringworm); scaly patches on the  
174 scalp sometime with hair loss for *Tinea capitis* (scalp ringworm); light or dark patches on the  
175 skin, most commonly on the chest and back for *Tinea versicolor* (pityriasis versicolor).

#### 176 **Data analyses**

177 Study data were recorded using standardized data collection forms. We used basic descriptive  
178 statistics to summarise the characteristics of the individuals who were screened, the number  
179 who were diagnosed with each skin-NTD, and other skin conditions. Results are shown  
180 stratified by country. Analyses were performed in Microsoft Excel 2013.

#### 181 **Ethics approval**

182 This study was approved in Cameroon by the National Ethics Committee on Research for  
183 Human Health (CNERSH) under decision N°2020/12/1327/CE/CNERSH/SP and  
184 administrative authorization of the Ministry of Public Health N°D30-  
185 308/L/MINSANTE/SG/DROS), in Côte d'Ivoire by the Comité National d'Ethique des  
186 Sciences de la Vie et de la Santé (IQR) through decision IQRG0075\_16/09/2020, in Ghana by  
187 the Ghana Health Service of Ethical Review Committee (GHS-ERC) and Noguchi Memorial  
188 Institute for Medical Research-Institutional Review Board (NMIMR-IRB) under decisions  
189 GHS-ERC 005/12/20 and NMIMR-IRB CPS 019/20-21), and in United Kingdom through  
190 London School of Hygiene and Tropical Medicine (LSHTM) under decision N° 21633 (19  
191 August 2021).

192 All participants and/or the parents/legal guardians of minors provided written informed  
193 consent before enrolment. In addition, assent was obtained from child participants.

194

## 195 **RESULTS**

### 196 **Demographic characteristics**

197 Case searches were conducted in 12 districts in Cameroon, six in Cote d'Ivoire, and seven in  
198 Ghana. A total of 61,080 individuals were screened, including 20,414 in Cameroon, 16,530 in  
199 Côte d'Ivoire, and 24,136 in Ghana. The male to female ratio was approximately 1:1 in the  
200 three countries (10804/9610, 8430/8100, and 13241/10895 respectively for Cameroon, Côte  
201 d'Ivoire and Ghana), with more than 90% of participants aged up to 15 years old  
202 (56471/61080).

### 203 **Skin lesions detected**

204 Table 2 summarizes the skin diseases detected in Cameroon, Côte d'Ivoire, and Ghana. Skin  
205 lesion accounted for 18.6% (11389 /61080) and included 20.6% (4204/20414) in Cameroon,  
206 30.8% (5095/16530) in Côte d'Ivoire and 8.7% (2090/24136) in Ghana.

207 The most frequent skin conditions encountered in Cameroon were *Tinea capitis*, scabies and  
208 yaws-like lesions. *T. capitis* accounted for 82.7% (3478/4204) of the skin conditions and was  
209 detected mainly in the health districts of Bankim (44.6%, 1552/3478) and Sangmélima  
210 (16.7%, 580/3478)). Scabies was the second most common skin condition detected in 5.1%  
211 (214/4204) cases of skin conditions seen. The majority of scabies cases were again detected in  
212 Bankim and Sangmélima with 37.9% (81/214) and 23.8% (51/214) of scabies among the  
213 detected skin lesions, respectively. Yaws-like lesions were the third most common skin  
214 condition (5%, 210/4204) and were identified in high numbers in Sangmélima (23.3%,  
215 49/210), Djoum (22.4%, 47/210) and Mbang (15.7%, 33/210). However, only 18 individuals  
216 were serologically confirmed as yaws cases almost all among Baka population.

217 *Pityriasis versicolor*, scabies, and yaws-like lesions accounted for 99.8% (5084/5095) of skin  
218 conditions detected in Côte d'Ivoire. *P. versicolor* was the most common skin condition  
219 (50.4% (2567/5095)) across the six health districts visited. Scabies represented 25.2%  
220 (1285/5095) of the conditions and yaws-like lesions were reported among 24.2% of  
221 individuals presenting with a skin condition (1232/5095) and were serologically confirmed in  
222 84 people.

223 In Ghana, yaws-like lesions accounted for 78.6% (1643/2090) of them, with serologically  
224 confirmed yaws among 440 individuals. Upper West Akim District and Asene Manso Akroso

225 recorded the highest number of yaws cases. Scabies and *T. capit**s* accounted for 20%  
226 (419/2090) and 1.3% (28/2090) of skin conditions, respectively.

227 **Table 2: Characteristics of skin diseases found in Cameroon, Côte d'Ivoire and Ghana**

| Country          | Health District  | Population screened | Leprosy    | Scabies     | Lymphoedema | Hydrocele  | <i>Pityriasis versicolor</i> | <i>Tinea capitis</i> | <i>Tinea corporis</i> | Suspected cases of BU | Suspected cases of yaws | Sd positive | DPP positive |
|------------------|------------------|---------------------|------------|-------------|-------------|------------|------------------------------|----------------------|-----------------------|-----------------------|-------------------------|-------------|--------------|
| Cameroon         | Abong-Mbang      | 223                 | 0          | 3           | 0           | 0          | 0                            | 16                   | 0                     | 2                     | 7                       | 0           | 0            |
|                  | Bankim           | 6911                | 2          | 81          | 0           | 0          | 112                          | 1552                 | 67                    | 0                     | 27                      | 0           | 0            |
|                  | Batouri          | 268                 | 0          | 0           | 0           | 0          | 0                            | 3                    | 1                     | 0                     | 0                       | 0           | 0            |
|                  | Bétaré-Oya       | 1281                | 5          | 3           | 0           | 8          | 0                            | 121                  | 9                     | 0                     | 6                       | 0           | 0            |
|                  | Djoum            | 1344                | 0          | 7           | 1           | 0          | 0                            | 241                  | 1                     | 0                     | 47                      | 1           | 1            |
|                  | Doumé            | 1141                | 6          | 2           | 0           | 0          | 22                           | 238                  | 0                     | 2                     | 7                       | 0           | 0            |
|                  | Lolodorf         | 1102                | 0          | 10          | 0           | 0          | 4                            | 102                  | 1                     | 1                     | 5                       | 0           | 0            |
|                  | Lomié            | 1868                | 0          | 5           | 3           | 0          | 0                            | 119                  | 0                     | 1                     | 11                      | 3           | 2            |
|                  | Mbang            | 976                 | 0          | 21          | 0           | 2          | 25                           | 199                  | 5                     | 0                     | 33                      | 19          | 15           |
|                  | Messamena        | 814                 | 1          | 27          | 0           | 2          | 0                            | 97                   | 0                     | 7                     | 4                       | 0           | 0            |
|                  | Sangmélima       | 3150                | 0          | 51          | 2           | 0          | 0                            | 580                  | 0                     | 0                     | 49                      | 0           | 0            |
|                  | Yokadouma        | 1336                | 1          | 4           | 0           | 1          | 5                            | 210                  | 0                     | 1                     | 14                      | 1           | 0            |
| <b>Sub-total</b> | <b>20414</b>     | <b>15</b>           | <b>214</b> | <b>6</b>    | <b>13</b>   | <b>168</b> | <b>3478</b>                  | <b>84</b>            | <b>14</b>             | <b>210</b>            | <b>24</b>               | <b>18</b>   |              |
| Côte d'Ivoire    | Divo             | 3080                | 1          | 180         | 0           | 0          | 134                          | 187                  | 39                    | 2                     | 112                     | 12          | 11           |
|                  | Tiassalé         | 4830                | 0          | 430         | 1           | 3          | 289                          | 405                  | 88                    | 3                     | 473                     | 87          | 54           |
|                  | Yamoussoukro     | 3700                | 0          | 221         | 0           | 0          | 144                          | 201                  | 42                    | 0                     | 259                     | 16          | 12           |
|                  | Toumodi          | 2160                | 0          | 132         | 0           | 0          | 115                          | 161                  | 34                    | 0                     | 151                     | 5           | 4            |
|                  | Daloa            | 2100                | 0          | 215         | 0           | 0          | 192                          | 268                  | 57                    | 0                     | 191                     | 7           | 3            |
|                  | Vavoua           | 660                 | 1          | 107         | 0           | 0          | 86                           | 120                  | 25                    | 0                     | 46                      | 0           | 0            |
|                  | <b>Sub-total</b> | <b>16530</b>        | <b>2</b>   | <b>1285</b> | <b>1</b>    | <b>3</b>   | <b>960</b>                   | <b>1342</b>          | <b>285</b>            | <b>5</b>              | <b>1 232</b>            | <b>127</b>  | <b>84</b>    |
| Ghana            | Ayensuanor       | 3119                | 0          | 11          | 0           | 0          | 0                            | 0                    | 0                     | 0                     | 194                     | 29          | 23           |
|                  | Asikuma          | 3496                | 0          | 0           | 0           | 0          | 0                            | 0                    | 0                     | 0                     | 201                     | 56          | 43           |

|  |                      |              |          |            |          |          |          |           |          |          |             |            |            |
|--|----------------------|--------------|----------|------------|----------|----------|----------|-----------|----------|----------|-------------|------------|------------|
|  | Odoben Brakwa        |              |          |            |          |          |          |           |          |          |             |            |            |
|  | Asene Manso Akroso   | 3331         | 0        | 86         | 0        | 0        | 0        | 14        | 0        | 0        | 306         | 204        | 196        |
|  | Akuapim North        | 3817         | 0        | 14         | 0        | 0        | 0        | 3         | 0        | 0        | 201         | 27         | 16         |
|  | Mpohor               | 3323         | 0        | 86         | 0        | 0        | 0        | 1         | 0        | 0        | 206         | 80         | 74         |
|  | Ajumako Enyan Essiam | 2864         | 0        | 98         | 0        | 0        | 0        | 2         | 0        | 0        | 211         | 15         | 8          |
|  | Upper West Akim      | 4186         | 0        | 124        | 0        | 0        | 0        | 8         | 0        | 0        | 324         | 89         | 80         |
|  | <b>Sub-total</b>     | <b>24136</b> | <b>0</b> | <b>419</b> | <b>0</b> | <b>0</b> | <b>0</b> | <b>28</b> | <b>0</b> | <b>0</b> | <b>1643</b> | <b>500</b> | <b>440</b> |

228 DPP+: Positive Dual Path Platform

229

230

## 231 **DISCUSSION**

232 In accordance with the NTD road map 2021-2030 (4), skin-NTDs are targeted for eradication  
233 (yaws), elimination (leprosy, onchocerciasis, lymphatic filariasis) and control (other skin-  
234 NTDs), and an integrated approach is the backbone to achieving these targets. The main study  
235 was focused on yaws while adopting an integrated approach in the screening of individuals in  
236 the selected health districts.

237 This project improved case detection of skin conditions such as yaws, scabies, lymphatic  
238 filariasis, Buruli ulcer, leprosy, tungiasis and superficial fungal infections in the three  
239 countries. Yaws and scabies were the predominant skin-NTDs.

240 The frequency of detection of serologically confirmed yaws among suspected cases in  
241 Cameroon, Côte d'Ivoire and Ghana was 8.6%, 6.8% and 26.8% respectively. These data  
242 show that yaws is more prevalent in endemic health districts in Ghana compared to Cameroon  
243 and Côte d'Ivoire, which is consistent with routine reporting data in Ghana with frequencies  
244 above 15% among suspected cases of yaws (34, 42, 43). Ghana has the second highest  
245 population density in West Africa and this can make it more difficult to control the spread of  
246 yaws. For instance, many MDA campaigns have been performed previously but the incidence  
247 of yaws is still high in many parts of the country (42, 44, 45). The data obtained in Cameroon  
248 overlap with previous findings, with less than 10% of yaws over suspected cases (46, 47) but  
249 lower to what has been reported during an outbreak (8). The decrease of yaws cases in  
250 Cameroon is linked to the surveillance impact by identifying and treating cases, and MDA  
251 implementation in the Congo Basin in December 2020 before the current study was  
252 conducted (48). The results of Côte d'Ivoire show that yaws remains prevalent in the study  
253 sites (1.6%; 81/5095) compared to findings in the Divo health district between 2016 and 2017  
254 that identified 8 cases of yaws out of 1,302 individuals with skin conditions (10). Côte  
255 d'Ivoire is one of the countries in Africa that has been most affected by skin-NTDs, including  
256 yaws (49, 50). The government of Côte d'Ivoire has implemented a number of programmes to  
257 address these diseases. Areas of co-endemicity of skin-NTDs have undergone several  
258 investigations with treatment which have certainly reduced the incidence of yaws (10). The  
259 results of this study suggest that additional efforts are needed to control yaws in the three  
260 countries where the disease is endemic, in particular the number of rounds of MDA which can  
261 be reviewed to significantly reduce the incidence of the disease (51). More than 80% of yaws  
262 like ulcers were not yaws (542/3085), suggesting that proper identification and management  
263 of other cutaneous ulcers, such as *H. ducreyi*, is important to improve patient outcomes.

264 Scabies was the most common skin-NTD detected among participants with skin conditions.  
265 The frequency was 25.2% in Côte d'Ivoire, 19.8% in Ghana and 5.1% in Cameroon. These  
266 data are high compared to previous studies in the three countries where proportions of scabies  
267 in people with skin lesions ranged almost from 3 to 9% during active case search. Difference  
268 may be due to a number of factors, including the duration of the screening, the context of the  
269 study and the methods used to detect scabies. The field activities of the current study were  
270 carried out over almost three years unlike the previous ones whose duration was over a few  
271 months. Earlier data from the three countries highlight the variability in the proportions of  
272 scabies depending on the context and methods to detect in hospital, prison, boarding school or  
273 even during active research in the community and in schools. Thus, data from several regions  
274 in Côte d'Ivoire show the proportions of scabies during active case searches among people  
275 suffering from skin diseases varied between 3.7% and 8.6% (10, 49, 52). In Ghana, recent  
276 findings from 2019 show that the proportions of scabies are between 6 to 12% among patients  
277 suffering from skin infections reported to urban and rural study health facilities (30, 53), and  
278 prevalences of 11.2% to 71% during outbreaks (54, 55). In Cameroon, surveys in urban areas  
279 in boarding schools show the prevalence of scabies of nearly 18% (56), 32% in prison (57),  
280 and a proportion of 2.8% during active case search in rural areas among respondents with skin  
281 disease (28). These data suggest that scabies is a major public health problem in all three  
282 countries.

283 Other skin-NTDs such as leprosy, Buruli ulcer, lymphatic filariasis and tungiasis were less  
284 common. Leprosy cases were not found in Ghana while in Cameroon and Côte d'Ivoire,  
285 leprosy cases varied between 2 and 15 throughout the study period. Available data show that  
286 some districts in Cameroon and Côte d'Ivoire are still of high endemicity (17, 31, 52). No  
287 case from Ghana could be due to the significant progress in controlling leprosy or targeted  
288 study sites. Buruli ulcer and lymphatic filariasis case numbers followed the same trend as  
289 leprosy in Cameroon and Côte d'Ivoire, and tungiasis was only recorded in Cameroon. Buruli  
290 ulcer and lymphatic filariasis are known to be endemic in Cameroon, Côte d'Ivoire and Ghana  
291 (11-13, 19-21) suggesting that the diseases may have similar risk factors, and that tungiasis  
292 may be more common in Cameroon due to specific environmental factors.

293 The study also found that superficial fungal infections were the most common form of skin  
294 disease in two of the three countries. In Cameroon, these conditions accounted for almost  
295 90% with the majority due to *Tinea capitis* while *Pityriasis versicolor* constituted the bulk of  
296 these infections in Côte d'Ivoire (50.4%). The findings are concordant with field data in

297 Cameroon, Côte d'Ivoire and Togo highlighting fungal infections as the main skin conditions  
298 (10, 28, 31, 58). In previous investigation, proportion of *Pityriasis versicolor* and *Tinea*  
299 *capitis* among diagnosed skin diseases in Côte d'Ivoire was approximately 45% of each (31);  
300 while in Cameroon proportion of *Pityriasis versicolor* in a rural setting was around 21% (28).  
301 In Ghana, superficial fungal infections were likely to be less common. Previous data indicated  
302 that fungal infections accounted for between 20 and 30% of patients with skin diseases (59,  
303 60). In this study, superficial fungal infections were not automatically recorded in Ghana,  
304 thus, only *Tinea capitis* was detected in 1.3% of individuals. In previous studies in Ghana,  
305 *Tinea capitis* was one of the main fungal agents with proportions above 20% (59).

306 We found that the proportion of people with skin lesions was not the same from one country  
307 to another and according to the diseases. This is likely due to a variety of factors, such as  
308 ecological zones (climate, vegetation and culture), population density and standard of life.  
309 However, early diagnosis and treatment are important to prevent the spread and to reduce the  
310 risk of complications. Reducing the burden of skin conditions may require improved access to  
311 clean water and sanitation facilities, education of people about the diseases and their  
312 prevention measures, availability and affordability of treatment, and reinforcement of public  
313 health measures to control the spread of diseases such as mass drug administration  
314 programmes.

315 All data were recorded at the health district level and subsequently transmitted to the  
316 respective NTD programmes. Through these data, we can see the diversity that can exist in  
317 terms of the burden of different diseases in the communities studied, hence the importance of  
318 pooling efforts to overcome NTDs. The studies that have been conducted in Côte d'Ivoire  
319 (10, 31), Benin (61) and Burkina Faso(62), are examples of integrated approaches to NTD  
320 control, elimination and eradication. These studies have shown that integrated approaches can  
321 be effective in reducing the prevalence of NTDs and improving the health of people in these  
322 countries. Moreover, since many skin-NTDs are zoonotic or have a (possible) non-human  
323 reservoir, a One Health guided approach should be used to handle integrated case search  
324 activities (63). Synergies between skin-NTD programs and, for example, neglected zoonotic  
325 disease programs (such as rabies elimination) could optimize the use of resources (logistics)  
326 and stimulate cross-sectoral collaboration that is key for the sustainable control of NTDs.

327 This study has some limitations. The skin-NTDs reported apart from yaws were only  
328 suspected cases because the diagnoses were made based on clinical examinations.  
329 Unfortunately, the additional diagnostic tools required for confirmation of the clinical

330 diagnosis were not available for this investigation. However, the data collected are still useful  
331 for guiding where skin-NTD eradication, elimination or control work should be directed in the  
332 future, i.e., data collection, training, diagnostics and the needs for medical care in these  
333 remote areas. We also acknowledge that the field visits were focused on areas where  
334 suspected yaws cases were reported which constitutes a bias for the estimation of other skin-  
335 NTDs.

336 This study highlights how the use of existing disease-specific resources can be maximized to  
337 determine the burden of other NTDs. Integration, technical and scientific progress are all  
338 pillars of the road map to end the suffering caused by NTDs by 2030.

### 339 **CONCLUSION**

340 We demonstrate improved data reporting of skin-NTDs when an integrated approach is used.  
341 This study contributes to the strengthening of the yaws surveillance system into a guided  
342 integrated system that is being put in place throughout each country. The detection of yaws  
343 cases in areas that have undergone MDA is remarkable and highlights the importance of  
344 rigorous active surveillance ideally with test confirmation of clinically suspected cases and  
345 optimal coverage of MDA campaigns. The main challenges remain the difficulty of accessing  
346 some communities where yaws is endemic, the follow-up of patients, and the inter-  
347 community movements which are sources of reinfection, and resources to manage the affected  
348 populations.

349

### 350 **ACKNOWLEDGEMENTS**

351 This study is part of the Lamp4Yaws EDCTP funded project (grant number RIA2018D-  
352 2495). Our gratitude goes towards all participants and individuals involved in the field.

353

354

## 355 REFERENCES

- 356 1. Hay RJ, Johns NE, Williams HC, Bolliger IW, Dellavalle RP, Margolis DJ, et al. The global  
357 burden of skin disease in 2010: an analysis of the prevalence and impact of skin conditions. *J*  
358 *Invest Dermatol.* 2014;134(6):1527-34.
- 359 2. Mitjà O, Marks M, Bertran L, Kollie K, Argaw D, Fahal AH, et al. Integrated Control and  
360 Management of Neglected Tropical Skin Diseases. *PLoS Negl Trop Dis.*  
361 2017;11(1):e0005136.
- 362 3. Ryan TJ. A brief history of tropical dermatology. *Clin Dermatol.* 2009;27(3):248-51.
- 363 4. WHO. Ending the neglect to attain the Sustainable Development Goals: A road map for  
364 neglected tropical diseases 2021–2030. World Health Organization; 2020. Licence: CC BY-  
365 NC-SA 3.0 IGO.
- 366 5. Asiedu K, Marks M, Hay R. Podoconiosis, skin-NTDs and global health. *Transactions of the*  
367 *Royal Society of Tropical Medicine and Hygiene.* 2020;114(12):887-8.
- 368 6. Tora A, Mengiste A, Davey G, Semrau M. Community Involvement in the Care of Persons  
369 Affected by Podoconiosis-A Lesson for Other Skin NTDs. *Tropical medicine and infectious*  
370 *disease.* 2018;3(3).
- 371 7. Boock AU, Awah PK, Mou F, Nichter M. Yaws resurgence in Bankim, Cameroon: The  
372 relative effectiveness of different means of detection in rural communities. *PLoS Negl Trop*  
373 *Dis.* 2017;11(5):e0005557.
- 374 8. Ndzomo Ngono JP, Tchatchouang S, Noah Tsanga MV, Njih Tabah E, Tchualeu A, Asiedu  
375 K, et al. Ulcerative skin lesions among children in Cameroon: It is not always Yaws.  
376 2021;15(2):e0009180.
- 377 9. Ghinai R, El-Duah P, Chi KH, Pillay A, Solomon AW, Bailey RL, et al. A cross-sectional  
378 study of 'yaws' in districts of Ghana which have previously undertaken azithromycin mass  
379 drug administration for trachoma control. *PLoS Negl Trop Dis.* 2015;9(1):e0003496.
- 380 10. Koffi AP, Yao TAK, Barogui YT, Diez G, Djakeaux S, Zahir MH, et al. Integrated approach  
381 in the control and management of skin neglected tropical diseases in three health districts of  
382 Côte d'Ivoire. *BMC public health.* 2020;20(1):517.
- 383 11. Marion E, Landier J, Boisier P, Marsollier L, Fontanet A, Le Gall P, et al. Geographic  
384 expansion of Buruli ulcer disease, Cameroon. *Emerging infectious diseases.* 2011;17(3):551-  
385 3.
- 386 12. Porten K, Sailor K, Comte E, Njikap A, Sobry A, Sihom F, et al. Prevalence of Buruli ulcer  
387 in Akonolinga health district, Cameroon: results of a cross sectional survey. *PLoS Negl Trop*  
388 *Dis.* 2009;3(6):e466.

- 389 13. Gyamfi E, Dogbe MA, Quaye C, Affouda AA, Kyei-Baffour E, Awuku-Asante D, et al.  
390 Variable Number Tandem Repeat Profiling of *Mycobacterium ulcerans* Reveals New  
391 Genotypes in Buruli Ulcer Endemic Communities in Ghana and Côte d'Ivoire. *Frontiers in*  
392 *microbiology*. 2022;13:872579.
- 393 14. Ngouateu OB, Dondji B. Leishmaniasis in Cameroon and neighboring countries: An  
394 overview of current status and control challenges. *Current Research in Parasitology & Vector-*  
395 *Borne Diseases*. 2022;2:100077.
- 396 15. Akuffo R, Sanchez C, Chicharro C, Carrillo E, Attram N, Mosore M-T, et al. Detection of  
397 cutaneous leishmaniasis in three communities of Oti Region, Ghana. *PLoS Negl Trop Dis*.  
398 2021;15(5):e0009416.
- 399 16. Eholié SP, Tanon AK, Folquet-Amorissani M, Doukouré B, Adoubryn KD, Yattara A, et al.  
400 [Three new cases of visceral leishmaniasis in Côte d'Ivoire]. *Bull Soc Pathol Exot*.  
401 2008;101(1):60-1.
- 402 17. Tabah EN, Nsagha DS, Bissek AZ, Bratschi MW, Njamnshi TN, Plushke G, et al. The  
403 Burden of Leprosy in Cameroon: Fifteen Years into the Post-elimination Era. *PLoS Negl*  
404 *Trop Dis*. 2016;10(10):e0005012.
- 405 18. Ofosu AA, Bonsu G. Case control study to determine the factors associated with leprosy in  
406 the sene district, brong ahafo region of ghana. *Ghana Med J*. 2010;44(3):93-7.
- 407 19. Deribe K, Bakajika DK, Zoure HM, Gyapong JO, Molyneux DH, Rebollo MP. African  
408 regional progress and status of the programme to eliminate lymphatic filariasis: 2000-2020.  
409 *International health*. 2020;13(Suppl 1):S22-s7.
- 410 20. de Souza DK, Osei-Poku J, Blum J, Baidoo H, Brown CA, Lawson BW, et al. The  
411 epidemiology of lymphatic filariasis in Ghana, explained by the possible existence of two  
412 strains of *Wuchereria bancrofti*. *The Pan African medical journal*. 2014;17:133.
- 413 21. Simpson H, Konan DO, Brahima K, Koffi JdA, Kashindi S, Edmiston M, et al. Effectiveness  
414 of community-based burden estimation to achieve elimination of lymphatic filariasis: A  
415 comparative cross-sectional investigation in Côte d'Ivoire. *PLOS Global Public Health*.  
416 2022;2(8):e0000760.
- 417 22. Mendouga Menye CRB, Kouotou EA, Atangana PJA. [Contribution of histopathology in the  
418 diagnosis of mycetoma in a Cameroonian trader and possibility of an urban contamination].  
419 *Journal de mycologie medicale*. 2017;27(3):417-20.
- 420 23. Adoubryn KD, Koffi KE, Troh E, Doukoure B, Kouadio-Yapo CG, Ouhon J, et al. Les  
421 mycétomes autochtones de Côte d'Ivoire : caractères épidémiologiques et étiologiques des cas  
422 confirmés. *Journal de mycologie medicale*. 2009;19(2):71-6.

- 423 24. Oladele RO, Ly F, Sow D, Akinkugbe AO, Ocansey BK, Fahal AH, et al. Mycetoma in West  
424 Africa. *Transactions of the Royal Society of Tropical Medicine and Hygiene.*  
425 2021;115(4):328-36.
- 426 25. Siewe JFN, Ngarka L, Tatah G, Mengnjo MK, Nfor LN, Chokote ES, et al. Clinical  
427 presentations of onchocerciasis-associated epilepsy (OAE) in Cameroon. *Epilepsy & behavior*  
428 : E&B. 2019;90:70-8.
- 429 26. Biritwum NK, de Souza DK, Asiedu O, Marfo B, Amazigo UV, Gyapong JO.  
430 Onchocerciasis control in Ghana (1974-2016). *Parasites & vectors.* 2021;14(1):3.
- 431 27. Koudou BG, Kouakou M-M, Ouattara AF, Yeo S, Brika P, Meite A, et al. Update on the  
432 current status of onchocerciasis in Côte d'Ivoire following 40 years of intervention: Progress  
433 and challenges. *PLoS Negl Trop Dis.* 2018;12(10):e0006897.
- 434 28. Bissek A-CZ-K, Tabah EN, Kouotou E, Sini V, Yepnjio FN, Nditanchou R, et al. The  
435 spectrum of skin diseases in a rural setting in Cameroon (sub-Saharan Africa). *BMC*  
436 *Dermatology.* 2012;12(1):7.
- 437 29. Kouotou EA, Nansseu JR, Sieleunou I, Defo D, Bissek AC, Ndam EC. Features of human  
438 scabies in resource-limited settings: the Cameroon case. *BMC Dermatol.* 2015;15:12.
- 439 30. Boateng LA. Healthcare-seeking behaviour in reporting of scabies and skin infections in  
440 Ghana: A review of reported cases. *Transactions of the Royal Society of Tropical Medicine*  
441 *and Hygiene.* 2020;114(11):830-7.
- 442 31. Yotsu RR, Kouadio K, Vagamon B, N'guessan K, Akpa AJ, Yao A, et al. Skin disease  
443 prevalence study in schoolchildren in rural Côte d'Ivoire: Implications for integration of  
444 neglected skin diseases (skin NTDs). *PLoS Negl Trop Dis.* 2018;12(5):e0006489.
- 445 32. Bourée P, Simeni Njonou R, Takougang I, Kaptue L. [Tungiasis in Bangou (West  
446 Cameroon)]. *Medecine et sante tropicales.* 2012;22(4):440-3.
- 447 33. Deka MA. Mapping the Geographic Distribution of Tungiasis in Sub-Saharan Africa.  
448 *Tropical medicine and infectious disease.* 2020;5(3).
- 449 34. Kazadi WM, Asiedu KB, Agana N, Mitjà O. Epidemiology of yaws: an update. *Clin*  
450 *Epidemiol.* 2014;6:119-28.
- 451 35. Yotsu RR, Fuller LC, Murdoch ME, van Brakel WH, Revankar C, Barogui MYT, et al. A  
452 global call for action to tackle skin-related neglected tropical diseases (skin NTDs) through  
453 integration: An ambitious step change. *PLoS Negl Trop Dis.* 2023;17(6):e0011357.
- 454 36. WHO. Ending the neglect to attain the sustainable development goals: a strategic framework  
455 for integrated control and management of skin-related neglected tropical diseases. World  
456 Health Organization; 2022. Licence: CC BY-NC-SA 3.0 IGO..

- 457 37. Molyneux DH, Hotez PJ, Fenwick A. "Rapid-impact interventions": how a policy of  
458 integrated control for Africa's neglected tropical diseases could benefit the poor. *PLoS Med.*  
459 2005;2(11):e336.
- 460 38. Engelman D, Fuller LC, Solomon AW, McCarthy JS, Hay RJ, Lammie PJ, et al.  
461 Opportunities for Integrated Control of Neglected Tropical Diseases That Affect the Skin.  
462 *Trends in parasitology.* 2016;32(11):843-54.
- 463 39. Handley BL, González-Beiras C, Tchatchouang S, Basing LA, Hugues KA, Bakheit M, et al.  
464 LAMP4yaws: *Treponema pallidum*, *Haemophilus ducreyi* loop mediated isothermal  
465 amplification - protocol for a cross-sectional, observational, diagnostic accuracy study. *BMJ*  
466 *open.* 2022;12(3):e058605.
- 467 40. Chandler DJ, Fuller LC. The Skin-A Common Pathway for Integrating Diagnosis and  
468 Management of NTDs. *Tropical medicine and infectious disease.* 2018;3(3).
- 469 41. WHO. Recognizing neglected tropical diseases through changes on the skin. Geneva: World  
470 Health Organization; 2018. Licence: CC BY-NC-SA 3.0 IGO.
- 471 42. Abdulai AA, Agana-Nsiire P, Biney F, Kwakye-Maclean C, Kyei-Faried S, Amponsa-  
472 Achiano K, et al. Community-based mass treatment with azithromycin for the elimination of  
473 yaws in Ghana—Results of a pilot study. *PLoS Negl Trop Dis.* 2018;12(3):e0006303.
- 474 43. Basing LA, Djan M, Simpson SV, Adu-Sarkodie Y. Mapping of yaws endemicity in Ghana;  
475 Lessons to strengthen the planning and implementation of yaws eradication. *medRxiv.* 2020.
- 476 44. Marks M, Mitjà O, Bottomley C, Kwakye C, Houinei W, Bauri M, et al. Comparative  
477 efficacy of low-dose versus standard-dose azithromycin for patients with yaws: a randomised  
478 non-inferiority trial in Ghana and Papua New Guinea. *The Lancet Global health.*  
479 2018;6(4):e401-e10.
- 480 45. Ghinai R, El-Duah P, Chi K-H, Pillay A, Solomon AW, Bailey RL, et al. A Cross-Sectional  
481 Study of 'Yaws' in Districts of Ghana Which Have Previously Undertaken Azithromycin  
482 Mass Drug Administration for Trachoma Control. *PLoS Negl Trop Dis.* 2015;9(1):e0003496.
- 483 46. Mbonda Noula Aimé Gilbert, Bissek Anne C., Kamgno Joseph, Tabah Ernest N., Nkeck Jan  
484 René, K NA. Re-emergence of Yaws in the Centre Region, Cameroon: data from four health's  
485 districts. *SSRN.* 2018.
- 486 47. Pampiglione S, Wilkinson AE. A study of yaws among pygmies in Cameroon and Zaire. *The*  
487 *British Journal of Venereal Diseases.* 1975;51(3):165.
- 488 48. Tchatchouang S. Eradicating yaws in Africa: challenges and progress. *The Lancet Microbe.*  
489 2022;3(4):e250.

- 490 49. Yotsu RR, Comoé CC, Ainyakou GT, Konan Ng, Akpa A, Yao A, et al. Impact of common  
491 skin diseases on children in rural Côte d'Ivoire with leprosy and Buruli ulcer co-endemicity:  
492 A mixed methods study. *PLoS Negl Trop Dis*. 2020;14(5):e0008291.
- 493 50. Konan DJ, Aka J, Yao KJ, Kouassi-Gohou V, Yao KE, Faye-Kette H. [Update on a  
494 neglected tropical disease from the routine health information system in Côte d'Ivoire: Yaws,  
495 2001 to 2011]. *Medecine et sante tropicales*. 2013;23(4):433-8.
- 496 51. John LN, Beiras CG, Houinei W, Medappa M, Sabok M, Kolmau R, et al. Trial of Three  
497 Rounds of Mass Azithromycin Administration for Yaws Eradication. *New England Journal of*  
498 *Medicine*. 2022;386(1):47-56.
- 499 52. Yotsu RR, Comoé CC, Ainyakou GT, Konan N, Akpa A, Yao A, et al. Impact of common  
500 skin diseases on children in rural Côte d'Ivoire with leprosy and Buruli ulcer co-endemicity: A  
501 mixed methods study. *PLoS Negl Trop Dis*. 2020;14(5):e0008291.
- 502 53. Rosenbaum BE, Klein R, Hagan PG, Seadey MY, Quarcoo NL, Hoffmann R, et al.  
503 Dermatology in Ghana: a retrospective review of skin disease at the Korle Bu Teaching  
504 Hospital Dermatology Clinic. *The Pan African medical journal*. 2017;26:125.
- 505 54. Kaburi BB, Ameme DK, Adu-Asumah G, Dadzie D, Tender EK, Addeh SV, et al. Outbreak  
506 of scabies among preschool children, Accra, Ghana, 2017. 2019;19(1):746.
- 507 55. Amoako YA, Phillips RO, Arthur J, Abugri MA, Akowuah E, Amoako KO, et al. A scabies  
508 outbreak in the North East Region of Ghana: The necessity for prompt intervention. *PLoS*  
509 *Negl Trop Dis*. 2020;14(12):e0008902.
- 510 56. Kouotou EA, Nansseu JR, Kouawa MK, Zoung-Kanyi Bissek AC. Prevalence and drivers of  
511 human scabies among children and adolescents living and studying in Cameroonian boarding  
512 schools. *Parasites & vectors*. 2016;9(1):400.
- 513 57. Kouotou EA, Nansseu JRN, Sangare A, Moguieu Bogne LL, Sieleunou I, Adegbi H, et al.  
514 Burden of human scabies in sub-Saharan African prisons: Evidence from the west region of  
515 Cameroon. *The Australasian journal of dermatology*. 2018;59(1):e6-e10.
- 516 58. Saka B, Kassang P, Gnosike P, Head MG, Akakpo AS, Teclessou JN, et al. Prevalence of  
517 skin Neglected Tropical Diseases and superficial fungal infections in two peri-urban schools  
518 and one rural community setting in Togo. *PLoS Negl Trop Dis*. 2022;16(12):e0010697.
- 519 59. Hogewoning A, Amoah A, Bavinck JN, Boakye D, Yazdanbakhsh M, Adegnika A, et al.  
520 Skin diseases among schoolchildren in Ghana, Gabon, and Rwanda. *International journal of*  
521 *dermatology*. 2013;52(5):589-600.

- 522 60. Lopez DM, Cervantes BYH, Emmanuel D, Agordoh PD, Almaguer FM, Lambert RG, et al.  
523 Infections of the Skin among Children in Ho Teaching Hospital of the Volta Region, Ghana.  
524 OALib. 2020;07(03):1-9.
- 525 61. Barogui YT, Diez G, Anagonou E, Johnson RC, Gomido IC, Amoukpo H, et al. Integrated  
526 approach in the control and management of skin neglected tropical diseases in Lalo, Benin.  
527 PLoS Negl Trop Dis. 2018;12(6):e0006584.
- 528 62. Lompo SZ, Barogui Y, Compaore J, Ouedraogo Y, Kafando C, Kambire-Diarra MC.  
529 Résultats de l'évaluation intégrée de la situation de la lèpre, de l'ulcère de Buruli et du pian  
530 autour des périmètres irrigués de Bagré et Kompienga au Burkina Faso. *Medecine et sante*  
531 *tropicales*. 2019;29(3):327-32.
- 532 63. WHO. Ending the neglect to attain the sustainable development goals. One Health: Approach  
533 for action against neglected tropical diseases 2021-2030. Geneva: World Health Organization;  
534 2022. Licence: CC BY-NC-SA 3.0 IGO..
- 535
